# Supplementary material for: Statistical analysis of the long-range transport of the 2015 Calbuco volcanic eruption from ground-based and space-borne observations
Source: Copernicus journal article supplement (doi:10.5194/angeo-2019-138), 2019-11-07
Supplement: Supplementary file [file angeo-2019-138-AC1-supplement.pdf]

## **RESPONSES TO REFEREE**

First of all, the authors acknowledge the referee and the editor for the time spent to review this manuscript and also for their constructive comments. The modifications are indicated by italic and red bold fonts in the revised manuscript.

### **REFEREE 1**

**In this sense I would accept the paper in its present form with the only suggestion to use the acronym "LiDAR" as a noun "lidar" similarly to the word radar. But this is up to the authors to consider.**

**Authors:** The suggestion mentioned by the referee 1 was included in the revised manuscript.
